# Supplementary material for: Transcriptome profiling and environmental linkage to salinity across Salicornia europaea vegetation
Source: PubMed Central journal article supplement (PMC6794796; doi:10.1186/s12870-019-2032-3), 2019-10-16

### RT-qPCR

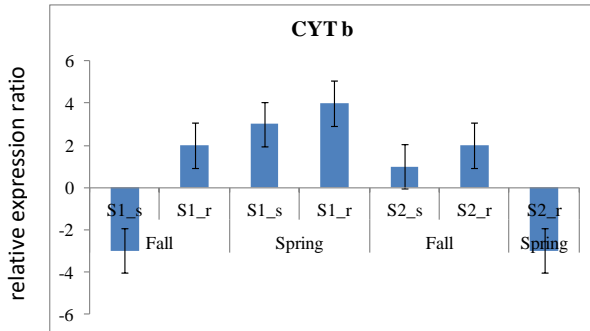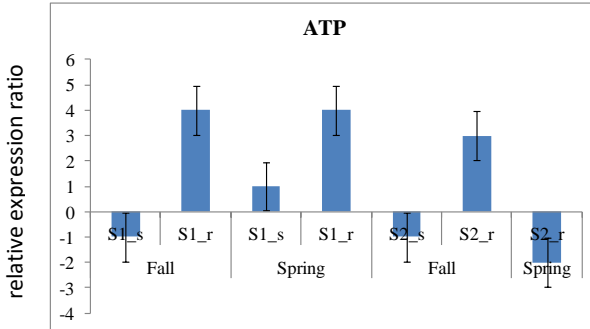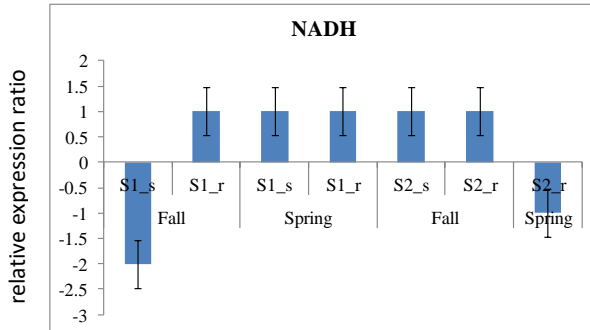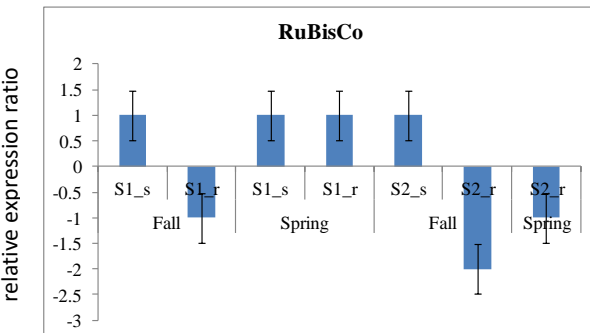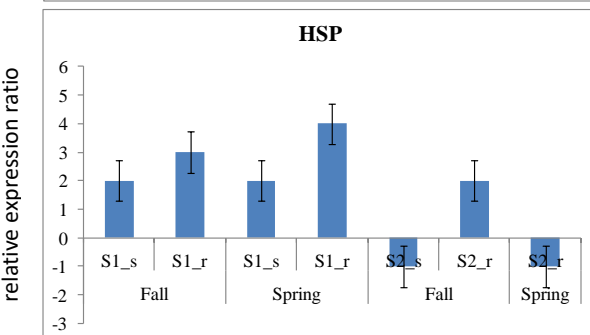

### RNAseq

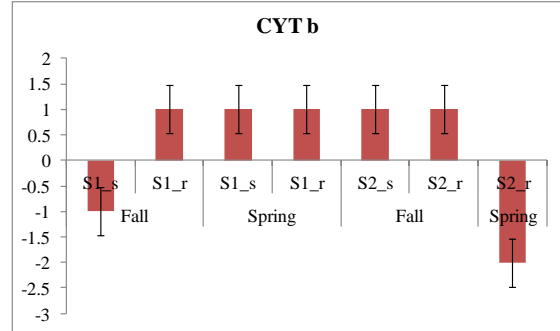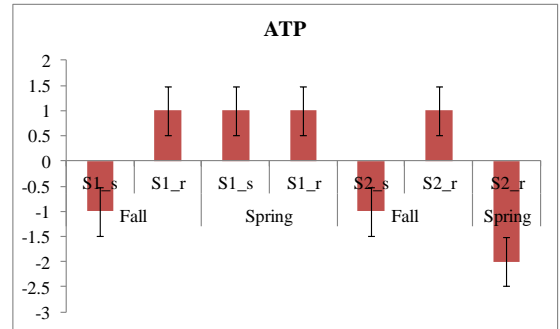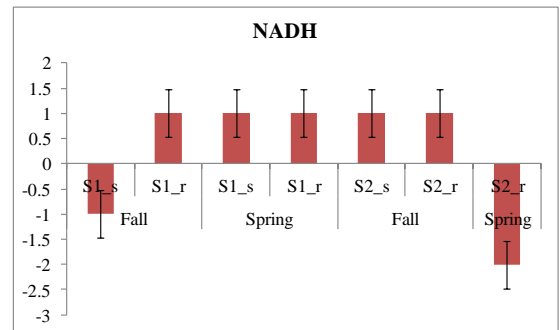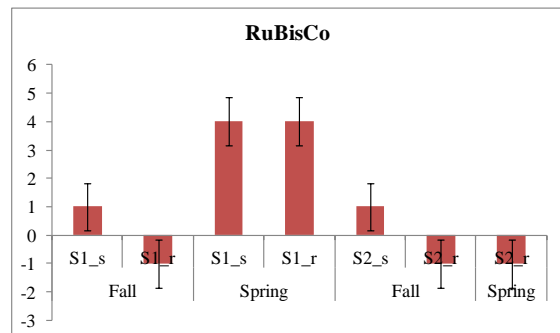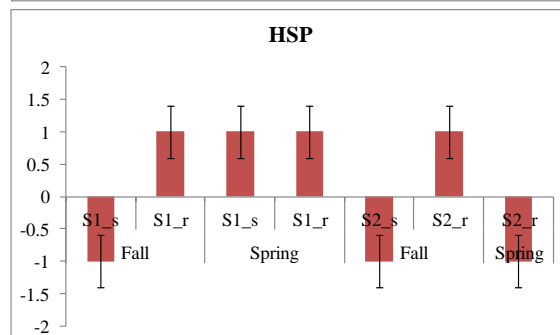

Supplement: 12870_2019_2032_MOESM5_ESM.pdf [file 12870_2019_2032_MOESM5_ESM.pdf]
