# Supplementary material for: Transcriptome profiling and environmental linkage to salinity across Salicornia europaea vegetation
Source: BMC Plant Biol. 2019 Oct 16;19:427. doi: 10.1186/s12870-019-2032-3 (PMC6794796; doi:10.1186/s12870-019-2032-3)
Supplement: Supplementary file 3 — Additional file 3. Summary of selected 30 differentially expressed genes (DEGs) in S. europaea with their molecular function (MF) and biological processes (BP). [file 12870_2019_2032_MOESM3_ESM.xlsx]

## Sheet: Addtional file 3
Title: Transcriptome profiling and environmental linkage to salinity across Salicornia europaea vegetation
Authors: Bliss Ursula Furtado, Istvan Nagy, Torben Asp, Jarosław Tyburski, Monika Skorupa, Marcin Gołębiewski, Piotr Hulisz, Katarzyna Hrynkiewicz
Additional file 4. Summary of selected 30 differentially expressed genes (DEG’s) in S. europaea with their molecular function (MF) and biological processes (BP).
Sequence name	Sequence description (Protein)	Function
I_FSs140924	5-methyltetrahydropteroyltriglutamate-homocysteinemethyltransferase	MF: 5-methyltetrahydropteroyltriglutamate-homocysteine S-methyltransferase activity, methionine synthase activity, zinc ion binding
		BP: homocysteine metabolic process, methionine biosynthetic process
I_FSc02175	Adenosylhomocysteinase	MF: adenosylhomocysteinase activity, copper ion binding, NAD binding
		BP: embryo development ending in seed dormancy,
		methylation-dependent chromatin silencing, one-carbon metabolic process, posttranscriptional gene silencing, S-adenosylhomocysteine catabolic process, S-adenosylmethionine cycle
I_FSs034042	ATP synthase subunit	MF: ATP binding, copper ion binding,
		proton-transporting ATP synthase activity, rotational mechanism
		BP: ATP synthesis coupled proton transport, response to cadmium ion
I_FSs032823	ATP-dependent Clp protease proteolytic subunit	MF: serine-type endopeptidase activity
		BP: chloroplast organization, regulation of timing of transition from vegetative to reproductive phase
I_FSs025891	Cytochrome c oxidase subunit	MF: copper ion binding, cytochrome-c oxidase activity, heme binding, iron ion binding
		BP: copper ion binding, cytochrome-c oxidase activity, heme binding, iron ion binding
I_FSs025892	Cytochrome c oxidase subunit	MF: copper ion binding, cytochrome-c oxidase activity, heme binding, iron ion binding
		BP: aerobic respiration, electron transport coupled proton transport, mitochondrial electron transport, cytochrome c to oxygen
I_FSs031479	Heat shock cognate 70 kDa protein	MF: ATP binding, protease binding
		BP: response to cadmium ion, response to heat, response to karrikin, response to virus
I_FSs040770	NADH dehydrogenase [ubiquinone] iron-sulfur protein	MF: NAD binding, NADPH dehydrogenase activity, quinone binding
		BP: transport
I_FSs036805	NADH-ubiquinone oxidoreductase chain	MF: NADH dehydrogenase (ubiquinone) activity
		BP: ATP synthesis coupled electron transport
I_FSs024581	Phenylalanine ammonia-lyase	MF: phenylalanine ammonia-lyase activity
		BP: cinnamic acid biosynthetic process, L-phenylalanine catabolic process, phenylpropanoid biosynthetic process, response to karrikin, response to oxidative stress
I_FSs031036	Photosystem I P700 chlorophyll an apoprotein	MF: 4 iron, 4 sulfur cluster binding, chlorophyll binding, metal ion binding, oxidoreductase activity
		BP: photosynthesis, protein-chromophore linkage
I_FSs032651	Photosystem II CP47 reaction center protein	MF: chlorophyll binding, electron transporter, transferring electrons within the cyclic electron transport pathway of photosynthesis activity
		BP: photosynthetic electron transport in photosystem II, photosystem II assembly, protein-chromophore linkage
I_FSs032652	Photosystem II CP47 reaction center protein	MF: chlorophyll binding, electron transporter, transferring electrons within the cyclic electron transport pathway of photosynthesis activity
		BP: photosynthetic electron transport in photosystem II, photosystem II assembly, protein-chromophore linkage
I_FSc05217	Photosystem II protein	MF: chlorophyll binding, electron transporter, transferring electrons within the cyclic electron transport pathway of photosynthesis activity, metal ion binding, oxidoreductase activity
		BP: photosynthetic electron transport in photosystem II, protein-chromophore linkage, response to herbicide
I_FSc03030	Predicted protein	MF :
I_FSs035480	Putative cytochrome c oxidase subunit 2-like	MF: copper ion binding, cytochrome-c oxidase activity
		BP: ATP synthesis coupled electron transport
I_FSs026058	Ribulosebisphosphate carboxylase	MF: magnesium ion binding, monooxygenase activity, ribulose-bisphosphate carboxylase activity
		BP: photorespiration, reductive pentose-phosphate cycle, response to abscisic acid, response to cadmium ion
I_FSs026060	Ribulosebisphosphate carboxylase	MF: magnesium ion binding, monooxygenase activity, ribulose-bisphosphate carboxylase activity
		BP: photorespiration, reductive pentose-phosphate cycle, response to abscisic acid, response to cadmium ion
I_FSc11228	Ribulosebisphosphate carboxylase	MF: magnesium ion binding, monooxygenase activity, ribulose-bisphosphate carboxylase activity
		BP: photorespiration, reductive pentose-phosphate cycle, response to abscisic acid, response to cadmium ion
I_FSs026057	Ribulosebisphosphate carboxylase	MF: magnesium ion binding, monooxygenase activity, nucleotide binding, ribulose-bisphosphate carboxylase activity
		BP: photorespiration, reductive pentose-phosphate cycle
I_FSs148818	RNA-dependent RNA polymerase	MF: catalytic activity, structural molecule activity, transporter activity, binding, ATPase regulator activity
		BP: activation of immune response, metabolic process, cellular process, cellular component organization, viral release from host cell, biological adhesion, single-organism process, response to stimulus, localization
I_FSs148820	RNA-dependent RNA polymerase	MF: catalytic activity, structural molecule activity , transporter activity, binding, ATPase regulator activity
		BP: activation of immune response, metabolic process, cellular process, cellular component organization, viral release from host cell, biological adhesion, response to stimulus, localization
I_FSs147305	S-adenosylmethionine decarboxylase proenzyme	MF: catalytic activity, binding, enzyme activator activity
		BP: cellular component organization, reproductive process, developmental process, response to stimulus
I_FSs147304	S-adenosylmethionine decarboxylase proenzyme	MF: adenosylmethionine decarboxylase activity
		BP: cellular component organization, reproductive process, developmental process, response to stimulus
I_FSc07324	S-adenosylmethionine synthase	MF: binding, transferase activity, transferring alkyl or aryl (other than methyl) groups
		BP: reproductive process, developmental process, Growth, single-organism process, response to stimulus
I_FSs007984	Uncharacterized protein	MF: catalytic activity, binding
		BP: defense response to bacterium, incompatible interaction, response to stimulus, response to other organism
I_FSc01091	Uncharacterized protein	No assigned function
I_FSs153048	Uncharacterized protein	No assigned function
I_FSs143861	Uncharacterized protein	No assigned function
I_FSc11241	Uncharacterized protein	No assigned function
